# Supplementary material for: Chlamydia trachomatis development requires both host glycolysis and oxidative phosphorylation but has only minor effects on these pathways
Source: PubMed Central journal article supplement (PMC9449673; doi:10.1016/j.jbc.2022.102338), 2022-08-02
Supplement: mmc1.pdf [file mmc1.pdf]

Table S1. Statistical analyses

The R environment v4.0.5 was used for all the analyses except Fig. 2.E for which an Ordinary 2-way ANOVA with a Tukey's multiple comparison test was performed.

| Figure | Comparison                          | Alternative hypothesis | Sample size               | Test                          | p-value | Adjusted p-value |
|--------|-------------------------------------|------------------------|---------------------------|-------------------------------|---------|------------------|
| 1.B    | CTD and CTDm                        | mean difference        | n = 76, n = 76            | Welch test                    | 0,02    | nr               |
| 1.C    | CTD and CTDm                        | mean difference        | n = 3, n = 3              | Welch test                    | 0,03    | nr               |
| 1.D    | CTD and CTDm                        | effect difference      | n = 9, n = 9   df = 13    | Contrast test in linear model | 2e-5    | nr               |
| 1.E    | CTD and CTDm                        | effect difference      | n = 9, n = 9   df = 14    | Contrast test in linear model | 1e-6    | nr               |
| 2.A    | Infected 24 h and Not infected      | effect difference      | n = 14, n = 14   df = 78  | Contrast test in linear model | 0.29    | 0.57             |
|        | Infected 30 h and Not infected      | effect difference      | n = 14, n = 14   df = 78  | Contrast test in linear model | 0.65    | 0.65             |
|        | Infected 48 h and Not infected      | effect difference      | n = 14, n = 14   df = 78  | Contrast test in linear model | 0.39    | 0.58             |
| 2.C    | Infected 8 h and Not infected       | effect difference      | n = 12, n = 12   df = 42  | Contrast test in linear model | 0.51    | 0.51             |
|        | Infected 30 h and Not infected      | effect difference      | n = 12, n = 12   df = 42  | Contrast test in linear model | 1e-5    | 2e-5             |
| 2.D    | NaN3/2-DG and Not treated           | effect difference      | n = 8, n = 8   df = 11    | Contrast test in linear model | 1e-5    | nr               |
| 3.A    | Not treated and 24h                 | mean difference        | n = 3, n = 3              | Welch test                    | 0.02    | 0.06             |
|        | Not treated and 30h                 | mean difference        | n = 3, n = 3              | Welch test                    | 0.08    | 0.08             |
|        | Not treated and 48h                 | mean difference        | n = 3, n = 3              | Welch test                    | 0.04    | 0.06             |
| 3.C    | Infected 24 h and Not infected      | effect difference      | n = 11, n = 13   df = 74  | Contrast test in linear model | 0.60    | 0.79             |
|        | Infected 30 h and Not infected      | effect difference      | n = 12, n = 13   df = 74  | Contrast test in linear model | 0.16    | 0.35             |
|        | Infected 48 h and Not infected      | effect difference      | n = 13, n = 13   df = 74  | Contrast test in linear model | 0.79    | 0.79             |
| 3.D    | Infected 24 h and Not infected 24 h | effect difference      | n = 20, n = 20   df = 110 | Contrast test in linear model | 0.22    | 0.32             |
|        | Infected 30 h and Not infected 30 h | effect difference      | n = 20, n = 20   df = 110 | Contrast test in linear model | 0.53    | 0.53             |
|        | Infected 48 h and Not infected 48 h | effect difference      | n = 20, n = 20   df = 110 | Contrast test in linear model | 0.03    | 0.09             |
| 3.E    | Infected 24 h and Not infected 24 h | effect difference      | n = 20, n = 20   df = 110 | Contrast test in linear model | 1e-4    | 2e-4             |
|        | Infected 30 h and Not infected 30 h | effect difference      | n = 20, n = 20   df = 110 | Contrast test in linear model | 0.09    | 0.09             |
|        | Infected 48 h and Not infected 48 h | effect difference      | n = 20, n = 20   df = 110 | Contrast test in linear model | 8e-5    | 2e-4             |
| 2.E    | Infected 24 h and Not infected      | effect difference      | n = 10, n = 10   df = 53  | Contrast test in linear model | 0.30    | 0.45             |
|        | Infected 30 h and Not infected      | effect difference      | n = 11, n = 10   df = 53  | Contrast test in linear model | 0.06    | 0.18             |
|        | Infected 48 h and Not infected      | effect difference      | n = 11, n = 10   df = 53  | Contrast test in linear model | 0.62    | 0.62             |
| 3.F    | Infected 24 h and Not infected      | mean difference        | n = 3, n = 3              | Welch test                    | 0.77    | 0.77             |
|        | Infected 30 h and Not infected      | mean difference        | n = 3, n = 3              | Welch test                    | 0.76    | 0.77             |
|        | Infected 48 h and Not infected      | mean difference        | n = 3, n = 3              | Welch test                    | 0.65    | 0.77             |
| 3.G    | Not treated and 24h                 | mean difference        | n = 3, n = 3              | Welch test                    | 0.90    | 0.91             |
|        | Not treated and 30h                 | mean difference        | n = 3, n = 3              | Welch test                    | 0.80    | 0.91             |
|        | Not treated and 48h                 | mean difference        | n = 3, n = 3              | Welch test                    | 0.85    | 0.91             |
| 3.H    | Not treated and 24h                 | mean difference        | n = 4, n = 4              | Welch test                    | 0.35    | 0.60             |
|        | Not treated and 30h                 | mean difference        | n = 4, n = 4              | Welch test                    | 0.40    | 0.60             |
|        | Not treated and 48h                 | mean difference        | n = 4, n = 4              | Welch test                    | 0.98    | 0.98             |
| 3.I    | Not treated and 24h                 | mean difference        | n = 4, n = 4              | Welch test                    | 0.94    | 0.98             |
|        | Not treated and 30h                 | mean difference        | n = 4, n = 4              | Welch test                    | 0.98    | 0.98             |
|        | Not treated and 48h                 | mean difference        | n = 4, n = 4              | Welch test                    | 0.93    | 0.98             |
| 4.A    | 0 and 5                             | mean difference        | n = 3, n = 3              | Welch test                    | 0.24    | 0.26             |
|        | 0 and 10                            | mean difference        | n = 3, n = 3              | Welch test                    | 4e-3    | 0.01             |
|        | 0 and 25                            | mean difference        | n = 3, n = 3              | Welch test                    | 2e-7    | 1e-6             |
| 4.B    | 0 and 0.5                           | mean difference        | n = 3, n = 3              | Welch test                    | 3e-3    | 3e-3             |
|        | 0 and 1                             | mean difference        | n = 3, n = 3              | Welch test                    | 1e-3    | 2e-3             |
|        | 0 and 2                             | mean difference        | n = 3, n = 3              | Welch test                    | 5e-4    | 2e-3             |
| 4.C    | 0 and 10                            | mean difference        | n = 3, n = 3              | Welch test                    | 1e-3    | 1e-3             |
|        | 0 and 20                            | mean difference        | n = 3, n = 3              | Welch test                    | 9e-4    | 1e-3             |
|        | 0 and 40                            | mean difference        | n = 3, n = 3              | Welch test                    | 4e-3    | 1e-3             |
| 4.D    | 0 and 0.5                           | effect difference      | n = 12, n = 12   df = 52  | Contrast test in linear model | 1e-13   | 3e-13            |
|        | 0 and 2                             | effect difference      | n = 12, n = 12   df = 52  | Contrast test in linear model | 6e-12   | 8e-12            |
|        | 0 and 10                            | effect difference      | n = 12, n = 12   df = 52  | Contrast test in linear model | 4e-8    | 4e-8             |
|        | 0 and 40                            | effect difference      | n = 12, n = 12   df = 52  | Contrast test in linear model | 1e-14   | 5e-14            |
| 4.E    | 0 and 5                             | mean difference        | n = 3, n = 3              | Welch test                    | 0.62    | 0.62             |
|        | 0 and 10                            | mean difference        | n = 3, n = 3              | Welch test                    | 0.46    | 0.62             |
|        | 0 and 25                            | mean difference        | n = 3, n = 3              | Welch test                    | 0.10    | 0.32             |
| 4.F    | 0 and 5                             | mean difference        | n = 3, n = 3              | Welch test                    | 0.23    | 0.23             |
|        | 0 and 10                            | mean difference        | n = 3, n = 3              | Welch test                    | 0.02    | 0.03             |
|        | 0 and 25                            | mean difference        | n = 3, n = 3              | Welch test                    | 0.01    | 0.03             |
| 4.G    | Not treated and 0.5                 | mean difference        | n = 4, n = 4              | Welch test                    | 0.70    | 0.91             |
|        | Not treated and 1                   | mean difference        | n = 4, n = 4              | Welch test                    | 0.86    | 0.91             |
|        | Not treated and 2                   | mean difference        | n = 4, n = 4              | Welch test                    | 0.10    | 0.59             |
|        | Not treated and 10                  | mean difference        | n = 4, n = 4              | Welch test                    | 0.67    | 0.91             |
|        | Not treated and 20                  | mean difference        | n = 4, n = 4              | Welch test                    | 0.78    | 0.91             |
| 4.J    | 0 and 5                             | mean difference        | n = 3, n = 3              | Welch test                    | 2e-3    | 2e-3             |
|        | 0 and 10                            | mean difference        | n = 3, n = 3              | Welch test                    | 8e-5    | 2e-4             |
|        | 0 and 0.5                           | mean difference        | n = 3, n = 3              | Welch test                    | 3e-3    | 3e-3             |
| 4.K    | 0 and 1                             | mean difference        | n = 3, n = 3              | Welch test                    | 3e-4    | 6e-4             |
|        | 0 and 5                             | mean difference        | n = 4, n = 4              | Welch test                    | 0.69    | 0.92             |
| 5.A    | 0 and 10                            | mean difference        | n = 4, n = 4              | Welch test                    | 0.54    | 0.92             |
|        | 0 and 25                            | mean difference        | n = 4, n = 4              | Welch test                    | 0.92    | 0.92             |
|        | Not.treated - siGPI1                | mean difference        | n = 4, n = 4              | Welch test                    | 0.49    | 0.77             |
| 5.C    | Not.treated - siGPI2                | mean difference        | n = 4, n = 4              | Welch test                    | 0.52    | 0.77             |
|        | siGPI1 - siGPI2                     | mean difference        | n = 4, n = 4              | Welch test                    | 0.93    | 0.93             |

|      |                                     |                   |                          |                               |       |           |
|------|-------------------------------------|-------------------|--------------------------|-------------------------------|-------|-----------|
| 5.E  | GPI.KO26 - GPI.KO8                  | mean difference   | n = 3, n = 3             | Welch test                    | 0.93  | 0.93      |
|      | GPI.KO26 - WT                       | mean difference   | n = 3, n = 3             | Welch test                    | 0.67  | 0.93      |
|      | GPI.KO8 - WT                        | mean difference   | n = 3, n = 3             | Welch test                    | 0.76  | 0.93      |
| 6.A  | 0 and 2.5                           | effect difference | n = 12, n = 12   df = 49 | Contrast test in linear model | 1e-13 | 3e-13     |
|      | 0 and 5                             | effect difference | n = 12, n = 11   df = 49 | Contrast test in linear model | 6e-12 | 8e-12     |
|      | 0 and 10                            | effect difference | n = 12, n = 11   df = 49 | Contrast test in linear model | 4e-8  | 4e-8      |
|      | 0 and 25                            | effect difference | n = 12, n = 10   df = 49 | Contrast test in linear model | 1e-14 | 5e-14     |
| 6.B  | 0 and 5                             | effect difference | n = 12, n = 11   df = 41 | Contrast test in linear model | 1e-9  | 1e-9      |
|      | 0 and 10                            | effect difference | n = 12, n = 12   df = 41 | Contrast test in linear model | 2e-14 | 3e-14     |
|      | 0 and 25                            | effect difference | n = 12, n = 12   df = 41 | Contrast test in linear model | 4e-16 | 1e-15     |
| 6.C  | 0 and 5                             | effect difference | n = 11, n = 10   df = 36 | Contrast test in linear model | 8e-3  | 8e-3      |
|      | 0 and 10                            | effect difference | n = 11, n = 10   df = 36 | Contrast test in linear model | 9e-6  | 1e-5      |
|      | 0 and 25                            | effect difference | n = 11, n = 11   df = 36 | Contrast test in linear model | 6e-8  | 2e-7      |
| 6.D  | 0 and 2.5                           | effect difference | n = 11, n = 10   df = 36 | Contrast test in linear model | 0.02  | 0.06      |
|      | 0 and 5                             | effect difference | n = 11, n = 10   df = 36 | Contrast test in linear model | 0.48  | 0.48      |
|      | 0 and 10                            | effect difference | n = 11, n = 11   df = 36 | Contrast test in linear model | 0.31  | 0.46      |
| 6.E  | 0 and 20                            | effect difference | n = 10, n = 10   df = 32 | Contrast test in linear model | 3e-7  | 3e-7      |
|      | 0 and 40                            | effect difference | n = 10, n = 9   df = 32  | Contrast test in linear model | 1e-9  | 2e-9      |
|      | 0 and 80                            | effect difference | n = 10, n = 9   df = 32  | Contrast test in linear model | 4e-11 | 1e-10     |
| 6.F  | 0 and 5                             | effect difference | n = 5, n = 5   df = 16   | Contrast test in linear model | 0.55  | 0.73      |
|      | 0 and 10                            | effect difference | n = 5, n = 5   df = 16   | Contrast test in linear model | 0.83  | 0.83      |
|      | 0 and 20                            | effect difference | n = 5, n = 5   df = 16   | Contrast test in linear model | 0.24  | 0.48      |
|      | 0 and 40                            | effect difference | n = 5, n = 5   df = 16   | Contrast test in linear model | 0.11  | 0.14      |
| 5.G  | 0 and 0.5                           | effect difference | n = 11, n = 11   df = 39 | Contrast test in linear model | 2e-17 | 3e-17     |
|      | 0 and 1                             | effect difference | n = 11, n = 11   df = 39 | Contrast test in linear model | 6e-17 | 7e-17     |
|      | 0 and 2                             | effect difference | n = 11, n = 12   df = 39 | Contrast test in linear model | 1e-19 | 3e-19     |
| 6    | 0 and 0.5                           | effect difference | n = 12, n = 9   df = 35  | Contrast test in linear model | 2e-3  | 2e-3      |
|      | 0 and 1                             | effect difference | n = 12, n = 10   df = 35 | Contrast test in linear model | 1e-7  | 2e-7      |
|      | 0 and 2                             | effect difference | n = 12, n = 10   df = 35 | Contrast test in linear model | 4e-11 | 1e-10     |
| 6.I  | No Glucose and Glucose              | effect difference | n = 11, n = 11   df = 18 | Contrast test in linear model | 2e-11 | <i>nr</i> |
| S3.C | Infected 24 h and Not infected 24 h | effect difference | n = 16, n = 16   df = 86 | Contrast test in linear model | 0.09  | 0.13      |
|      | Infected 30 h and Not infected 30 h | effect difference | n = 15, n = 16   df = 86 | Contrast test in linear model | 0.75  | 0.75      |
|      | Infected 48 h and Not infected 48 h | effect difference | n = 16, n = 16   df = 86 | Contrast test in linear model | 8e-4  | 2e-3      |
| S3.D | Infected 24 h and Not infected 24 h | effect difference | n = 16, n = 16   df = 86 | Contrast test in linear model | 0.98  | 0.98      |
|      | Infected 30 h and Not infected 30 h | effect difference | n = 15, n = 16   df = 86 | Contrast test in linear model | 0.15  | 0.23      |
|      | Infected 48 h and Not infected 48 h | effect difference | n = 16, n = 16   df = 86 | Contrast test in linear model | 1e-6  | 3e-6      |
| S4.A | 0 and 5                             | effect difference | n = 12, n = 12   df = 53 | Contrast test in linear model | 4e-4  | 5e-4      |
|      | 0 and 10                            | effect difference | n = 12, n = 12   df = 53 | Contrast test in linear model | 3e-3  | 3e-3      |
|      | 0 and 25                            | effect difference | n = 12, n = 12   df = 53 | Contrast test in linear model | 4e-9  | 9e-9      |
|      | 0 and 50                            | effect difference | n = 12, n = 12   df = 53 | Contrast test in linear model | 4e-9  | 9e-9      |
| S4.B | 0 and 1                             | mean difference   | n = 6, n = 3             | Welch test                    | 0.51  | 0.51      |
|      | 0 and 2.5                           | mean difference   | n = 6, n = 3             | Welch test                    | 0.09  | 0.12      |
|      | 0 and 5                             | mean difference   | n = 6, n = 3             | Welch test                    | 0.02  | 0.03      |
|      | 0 and 10                            | mean difference   | n = 6, n = 3             | Welch test                    | 0.01  | 0.04      |
| S4.C | 0 and 10                            | mean difference   | n = 3, n = 3             | Welch test                    | 0.45  | <i>nr</i> |
| S5.B | 0 and 10                            | effect difference | n = 11, n = 12   df = 40 | Contrast test in linear model | 6e-4  | 2e-3      |
|      | 0 and 20                            | effect difference | n = 11, n = 12   df = 40 | Contrast test in linear model | 0.47  | 0.71      |
|      | 0 and 40                            | effect difference | n = 11, n = 11   df = 40 | Contrast test in linear model | 0.95  | 0.95      |
| S5.C | 0 and 2.5                           | effect difference | n = 14, n = 14   df = 50 | Contrast test in linear model | 0.09  | 0.09      |
|      | 0 and 5                             | effect difference | n = 14, n = 15   df = 50 | Contrast test in linear model | 2e-3  | 3e-3      |
|      | 0 and 10                            | effect difference | n = 14, n = 14   df = 50 | Contrast test in linear model | 1e-6  | 4e-6      |
| S5.D | 0 and 0.5                           | effect difference | n = 11, n = 9   df = 35  | Contrast test in linear model | 9e-6  | 1e-5      |
|      | 0 and 1                             | effect difference | n = 11, n = 11   df = 35 | Contrast test in linear model | 2e-4  | 2e-4      |
|      | 0 and 2                             | effect difference | n = 11, n = 10   df = 35 | Contrast test in linear model | 1e-10 | 3e-10     |
